# Supplementary material for: Osseointegration of Titanium Implants in a Botox-Induced Muscle Paralysis Rat Model Is Sensitive to Surface Topography and Semaphorin 3A Treatment
Source: Biomimetics (Basel). 2023 Feb 25;8(1):93. doi: 10.3390/biomimetics8010093 (PMC10046785; doi:10.3390/biomimetics8010093)
Supplement: Supplementary file 1 [file biomimetics-08-00093-s001.zip]

Archive with 4 entries (4 files):
- Supplemental Figure 1.TIF
- Supplemental Figure 2.TIF
- Supplemental Figure Legends.pdf
- Table 1.pdf
