# Supplementary material for: Osseointegration of Titanium Implants in a Botox-Induced Muscle Paralysis Rat Model Is Sensitive to Surface Topography and Semaphorin 3A Treatment
Source: Biomimetics (Basel). 2023 Feb 25;8(1):93. doi: 10.3390/biomimetics8010093 (PMC10046785; doi:10.3390/biomimetics8010093)
Supplement: Supplementary file 1 [file biomimetics-08-00093-s001.zip › Table 1.pdf]

| Implants       | Group       | Total BIC        | Marrow BIC      | Cortical BIC    | Max Load       | Torsional Stiffness | Yield Point     |
|----------------|-------------|------------------|-----------------|-----------------|----------------|---------------------|-----------------|
| <b>SLAnano</b> | Control     | 33.00±1.61<br>A  | 22.95±1.87<br>A | 61.57±3.06<br>A | 0.16±0.01<br>A | 1.92±0.09<br>A      | 0.16±0.02<br>A  |
|                | BTX         | 22.02±2.86<br>B  | 18.22±2.96<br>A | 35.70±3.83<br>B | 0.07±0.01<br>B | 1.33±0.14<br>B      | 0.05±0.00<br>B  |
|                | BTX+ Sema3A | 29.36±2.93<br>AB | 25.51±3.30<br>A | 47.20±1.56<br>C | 0.08±0.01<br>B | 1.33±0.15<br>B      | 0.07±0.01<br>B  |
|                |             |                  |                 |                 |                |                     |                 |
| <b>PT</b>      | Control     | 38.42±4.02<br>A  | 34.02±4.26<br>A | 41.21±6.76<br>A | 0.04±0.01<br>A | 0.60±0.11<br>A      | 0.02±0.00<br>A  |
|                | BTX         | 18.27±2.11<br>B  | 17.04±2.38<br>B | 30.31±6.79<br>A | 0.02±0.00<br>B | 0.31±0.09<br>A      | 0.01±0.00<br>B  |
|                | BTX+ Sema3A | 20.54±1.64<br>B  | 19.75±1.82<br>B | 31.07±4.66<br>A | 0.02±0.00<br>B | 0.29±0.08<br>A      | 0.01±0.00<br>AB |

Table 1. Evaluation of osseointegration by microCT and removal torque testing. Results presented as mean ± SEM. Groups not sharing letters are different at  $\alpha=0.05$  using one-way ANOVA with Tukey post correction. Abbreviations: BIC, bone-to-implant contact.
